# Supplementary material for: The Overall Effect of Diversity Management on the Competitiveness of Firms in Ethiopian Industries, With a Focus on Adama City, Oromia Region
Source: Research Square preprint supplement (doi:10.21203/rs.3.rs-8291089/v1), 2026-01-09
Supplement: Supplementary file 1 [file 2029c64651256387bf654e89.docx]

**Appendix VI. Preliminary Analysis of Normality**


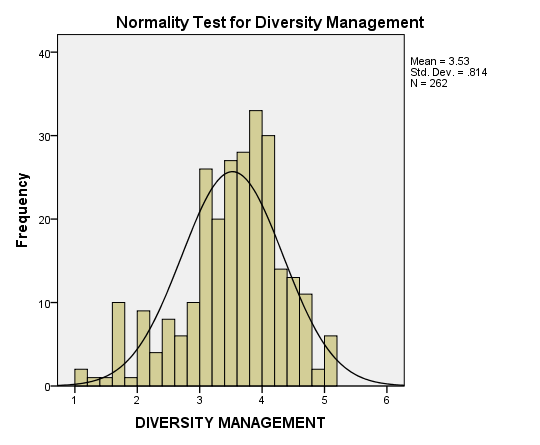


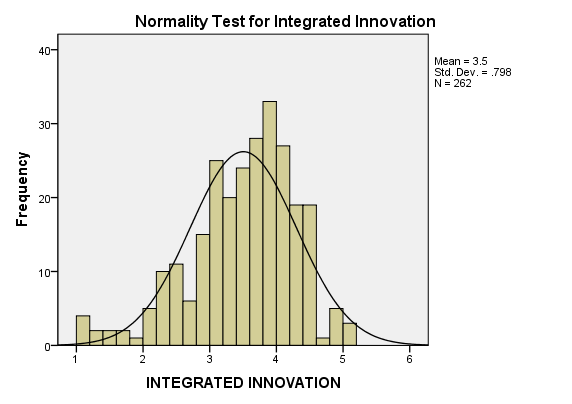


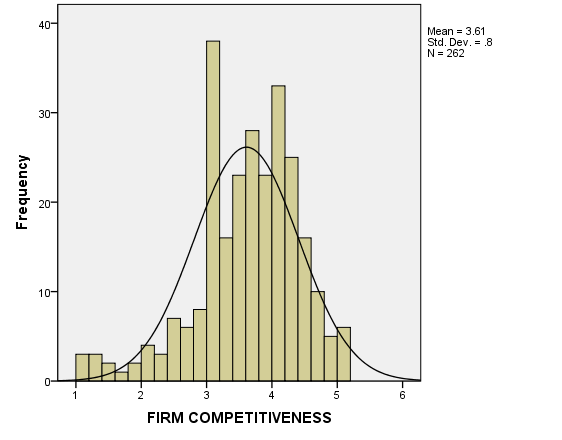


**Appendix VII: Relationship between IV and DV, and Relationship among IV by Scatter Plot and Correlation.**

**
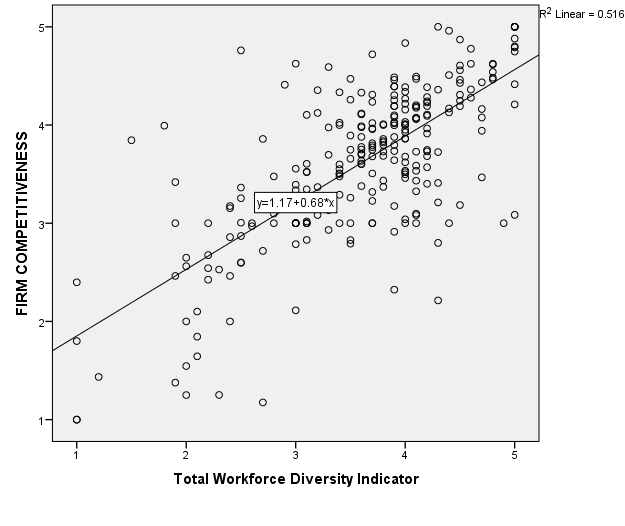
**

**
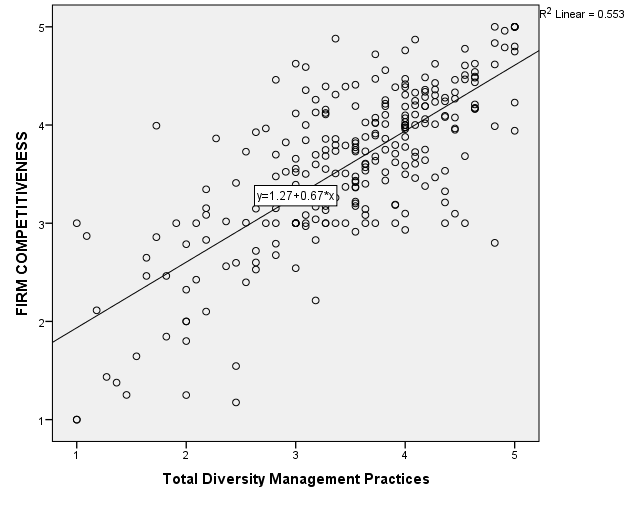
**


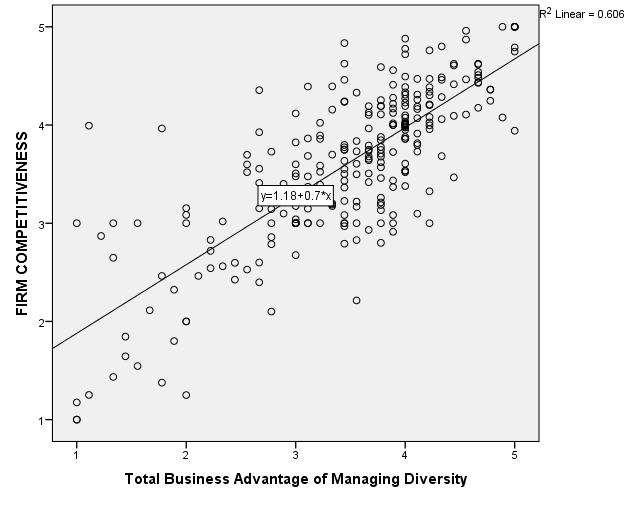


| **Correlations among indenpendet variables** | | | | |
| --- | --- | --- | --- | --- |
|  | | Workforce Diversity Indicator | Diversity Management Practices | Business Advantage of Managing Diversity |
| Workforce Diversity Indicator | Pearson Correlation | 1 | .755** | .749** |
| Sig. (2-tailed) |  | .000 | .000 |
| N | 262 | 262 | 262 |
| Diversity Management Practices | Pearson Correlation | .755** | 1 | .880** |
| Sig. (2-tailed) | .000 |  | .000 |
| N | 262 | 262 | 262 |
| Business Advantage of Managing Diversity | Pearson Correlation | .749** | .880** | 1 |
| Sig. (2-tailed) | .000 | .000 |  |
| N | 262 | 262 | 262 |
| **. Correlation is significant at the 0.01 level (2-tailed). | | | | |


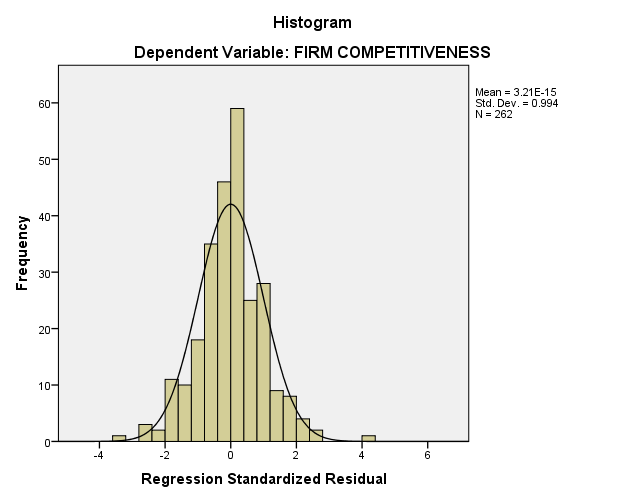
**Appendix VIII: Outliers, Normality, Linearity, Homoscedasticity, Independence of Residuals**


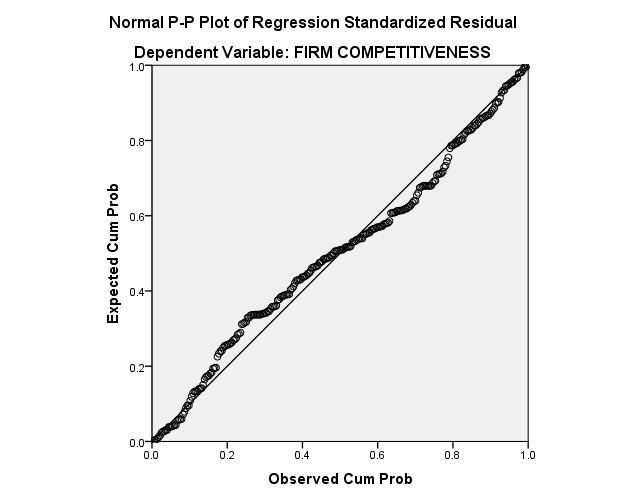


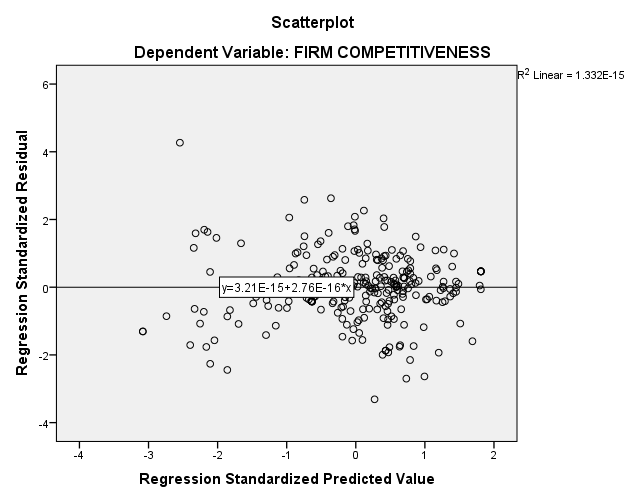


**Appendix IX: The Scatterplot for Pre-liminary Analysis of Mediation**


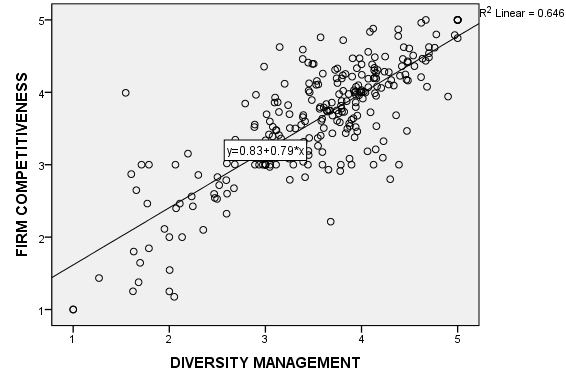


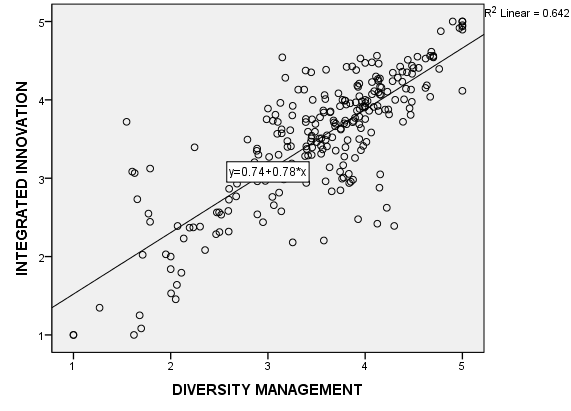


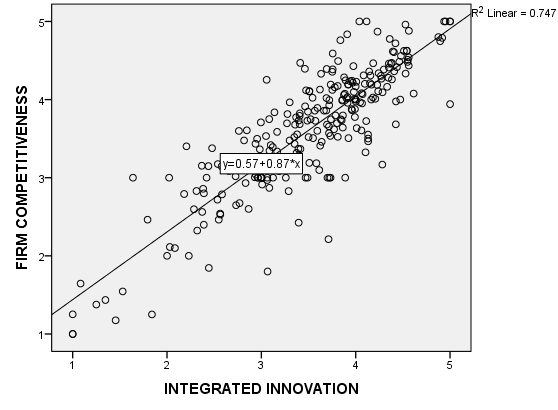


**Appendix X: Normality test of TWO-WAY ANOVA**


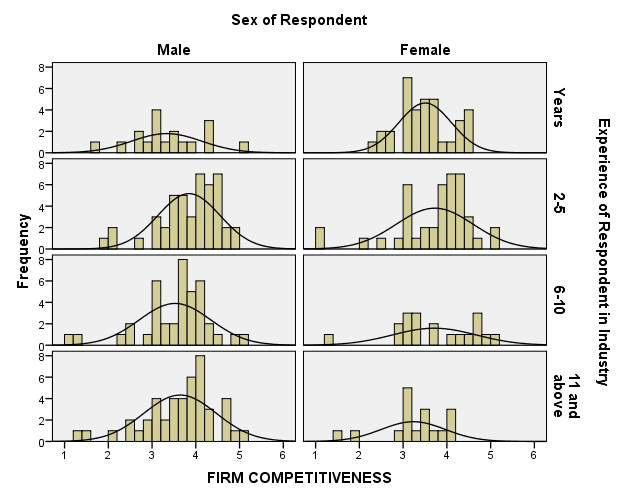


**Appendix XI: Assessment of normality for Effects**

| Variable | min | max | skew | c.r. | kurtosis | c.r. |
| --- | --- | --- | --- | --- | --- | --- |
| TExperience | 2.000 | 3.333 | -.702 | -4.637 | -.722 | -2.386 |
| TEducation | 2.333 | 3.667 | -.455 | -3.008 | -1.083 | -3.580 |
| TAge | 2.600 | 4.000 | -.010 | -.065 | -.749 | -2.475 |
| TGender | 2.000 | 3.667 | .287 | 1.895 | -1.125 | -3.717 |
| TBS | 1.000 | 5.000 | -.908 | -5.999 | .806 | 2.663 |
| TFP | 1.000 | 5.000 | -.956 | -6.316 | 1.290 | 4.261 |
| TTD | 1.000 | 5.000 | -.620 | -4.099 | .676 | 2.233 |
| TMS | 1.000 | 5.000 | -.483 | -3.193 | .315 | 1.041 |
| TPP | 1.000 | 5.000 | -.820 | -5.419 | .490 | 1.619 |
| PRI1 | 1.000 | 5.000 | -.773 | -5.108 | .239 | .788 |
| PRI2 | 1.000 | 5.000 | -.793 | -5.242 | .234 | .772 |
| PRI3 | 1.000 | 5.000 | -.587 | -3.880 | -.203 | -.671 |
| PRI4 | 1.000 | 5.000 | -.600 | -3.968 | -.142 | -.470 |
| PRI5 | 1.000 | 5.000 | -.762 | -5.038 | .143 | .472 |
| PRI6 | 1.000 | 5.000 | -.786 | -5.196 | .362 | 1.195 |
| PRI7 | 1.000 | 5.000 | -.703 | -4.646 | .118 | .389 |
| PRI8 | 1.000 | 5.000 | -.646 | -4.268 | .053 | .177 |
| PI1 | 1.000 | 5.000 | -.739 | -4.884 | -.022 | -.074 |
| PI2 | 1.000 | 5.000 | -.600 | -3.962 | -.383 | -1.265 |
| PI3 | 1.000 | 5.000 | -.599 | -3.959 | -.341 | -1.128 |
| PI4 | 1.000 | 5.000 | -.437 | -2.885 | -.678 | -2.241 |
| PI5 | 1.000 | 5.000 | -.928 | -6.136 | .362 | 1.195 |
| PI6 | 1.000 | 5.000 | -.859 | -5.676 | .232 | .766 |
| PI7 | 1.000 | 5.000 | -.613 | -4.053 | -.332 | -1.096 |
| PI8 | 1.000 | 5.000 | -.621 | -4.104 | -.205 | -.677 |
| PI9 | 1.000 | 5.000 | -.388 | -2.566 | -.535 | -1.767 |
| Multivariate |  |  |  |  | 209.075 | 44.345 |
