# Supplementary material for: The Overall Effect of Diversity Management on the Competitiveness of Firms in Ethiopian Industries, With a Focus on Adama City, Oromia Region
Source: Research Square preprint supplement (doi:10.21203/rs.3.rs-8291089/v1), 2026-01-09
Supplement: Supplementary file 2 [file a4b30b0fbd862760112486ff.docx]

**Appendix V: Reliability Scale of Independent Variables and Dependent Variables**

**Reliability Scale for Workforce Diversity Indicators**

| Cronbach's Alpha | N of Items |
| --- | --- |
| .938 | 10 |
| Items | | | Corrected Item-Total Correlation | Cronbach's Alpha if Item Deleted |
| Workforce in our industry is characterized with multiplicity of perspectives | | | .532 | .942 |
| Workforce in our industry is characterized with multiplicity of knowledge | | | .692 | .935 |
| Workforce in our industry is diversified to bring improvement of product | | | .736 | .932 |
| Workforce in our industry is diversified to bring improvement of service quality | | | .788 | .930 |
| Workforce in our industry is diversified to enhance effective communication | | | .810 | .929 |
| Workforce in our industry is diversified to enhance information sharing in the firm | | | .792 | .930 |
| Workforce in our industry is diversified to support effective decision-making | | | .789 | .930 |
| Workforce in our industry is diversified to enhance problem solving in the firm | | | .824 | .928 |
| Workforce in our industry is diversified to enhance competitive advantage of firm | | | .805 | .929 |
| Workforce in our industry is diversified to enhance reputation of our firm | | | .738 | .932 |

**Reliability Scale for Diversity Management Practices**

| Cronbach's Alpha | N of Items |
| --- | --- |
| .938 | 11 |
| Items | | | Corrected Item-Total Correlation | Cronbach's Alpha if Item Deleted |
| There is a clear flow of various ideas in our organization among the workers. | | | .525 | .940 |
| Our top management along with the human resource ensures the attraction of recruiting diverse workforce | | | .727 | .932 |
| Employees are not discriminated on the base of any dimension of diversity in our organization (age, gender, experience, educational background, ethnicity, religion) | | | .717 | .933 |
| Our organization conducts periodic diversity awareness sessions for employees | | | .639 | .936 |
| Our organization emphasizes diversity among team assignments | | | .779 | .930 |
| Our organization emphasizes inclusivity among team assignments | | | .784 | .930 |
| There is a Well management of team in which communication with trust growth up | | | .824 | .928 |
| Our organization practice Preventing discrimination | | | .716 | .933 |
| Our organization practice promotion inclusiveness | | | .810 | .929 |
| Our organization practice The act of empowering people | | | .763 | .931 |
| Our organization practice Understanding through using differences in every person | | | .808 | .929 |

**Reliability Scale for Business Advantage of Managing Diversity**

| Cronbach's Alpha | N of Items |
| --- | --- |
| .949 | 9 |
| Items | | | Corrected Item-Total Correlation | Cronbach's Alpha if Item Deleted |
| Managing Diversity in our organization helps to enhance innovation with fresh ideas | | | .759 | .946 |
| Managing Diversity in our organization makes teamwork a learning experience | | | .817 | .943 |
| Managing Diversity in our organization improves the goodwill of an organization | | | .847 | .941 |
| Managing Diversity in our organization improves morale of organization manpower | | | .815 | .943 |
| Managing Diversity in our organization helps to have innovation activities throughout the whole member of the organization | | | .815 | .943 |
| Managing Diversity in our organization helps in the process of achieving the planned goals | | | .806 | .943 |
| Managing diversity in our organization facilitates an opportunity for the workers in being of productive | | | .839 | .941 |
| Managing Diversity in our organization helps us to Increase problem solving through knowledge resources | | | .774 | .945 |
| Managing diversity in our organization helps us to serve diverse customers (society) | | | .716 | .948 |

**Reliability Scale for Production and Productivity**

| Cronbach's Alpha | N of Items |
| --- | --- |
| .946 | 8 |
| Items | | | Corrected Item-Total Correlation | Cronbach's Alpha if Item Deleted |
| Ability to introduce new products to the market before competitors | | | .744 | .943 |
| Ability to introduce new services to the market before competitors | | | .802 | .939 |
| The increase of productivity at firm level | | | .790 | .940 |
| The increase of real income of citizens | | | .728 | .944 |
| Offer products that customers are willing to pay | | | .858 | .935 |
| Offer services that customers are willing to pay | | | .869 | .934 |
| The ability to produce the right goods of the right quality, at the right price, at the right time | | | .846 | .936 |
| The ability to produce the right services of the right quality, at the right price, at the right time | | | .798 | .939 |

**Reliability Scale for Market Share**

| Cronbach's Alpha | N of Items |
| --- | --- |
| .890 | 5 |
| Items | | | Corrected Item-Total Correlation | Cronbach's Alpha if Item Deleted |
| The ability to generate profit with having significant market share | | | .721 | .869 |
| Export attractiveness through higher market access | | | .752 | .862 |
| The ability to control of distribution | | | .780 | .856 |
| Increased market share with reduced cost structure | | | .765 | .860 |
| The ability of exporting its goods to global market | | | .658 | .884 |

**Reliability Scale for Technology and Development**

| Cronbach's Alpha | N of Items |
| --- | --- |
| .923 | 6 |
|  | | | Corrected Item-Total Correlation | Cronbach's Alpha if Item Deleted |
| Adoption of technology with increased improvement | | | .799 | .907 |
| The firm able to detect (adapt) to changes in the environment | | | .795 | .908 |
| Meeting competitive market criteria permanently more favorable than those rivals | | | .783 | .909 |
| The availability of advanced highly educated people | | | .734 | .914 |
| Improve employment skills through training | | | .777 | .909 |
| The Availability of knowledge triangle (education, research and innovation) | | | .763 | .911 |

**Reliability Scale for Financial Performance**

| Cronbach's Alpha | N of Items |
| --- | --- |
| .911 | 5 |
| Items | | | Corrected Item-Total Correlation | Cronbach's Alpha if Item Deleted |
| A good financial performance of a firm | | | .772 | .892 |
| The ability of a firm to sell products | | | .814 | .883 |
| Both products and prices are related to fit the requirements of the relevant markets | | | .843 | .876 |
| Both products and prices are related to be remain profitable | | | .818 | .882 |
| Return on sales, return on assets, turn over | | | .627 | .919 |

**Reliability Scale for Business Sustainability**

| Cronbach's Alpha | N of Items |
| --- | --- |
| .957 | 8 |
| Items | | | Corrected Item-Total Correlation | Cronbach's Alpha if Item Deleted |
| The ability of the company to continue the business (protect its investments) | | | .782 | .955 |
| The ability of firm to generating return on investments | | | .842 | .951 |
| The ability of the firm in guaranteeing future employment | | | .853 | .950 |
| Value creation with increased customer satisfaction | | | .832 | .952 |
| Firm strategy utilization leading to achievement of firm objectives (goals) | | | .859 | .950 |
| The ability to design products superior to those offered by competitors | | | .848 | .951 |
| The ability to produce products superior to those offered by competitors | | | .844 | .951 |
| The ability to market products superior to those offered by competitors | | | .846 | .951 |
