# Supplementary material for: The Overall Effect of Diversity Management on the Competitiveness of Firms in Ethiopian Industries, With a Focus on Adama City, Oromia Region
Source: Research Square preprint supplement (doi:10.21203/rs.3.rs-8291089/v1), 2026-01-09
Supplement: Supplementary file 3 [file a72930b65faab78bfec18653.docx]

**APPENDIX IV: Book Code Used in IBM SPSS Version 26.0**

| Gender | Sex of Respondent | {1, Male}... | Nominal |
| --- | --- | --- | --- |
| Age | Age of Respondent | {1, 20 and below}... | Scale |
| Education | Educational Level of Respondent | {1, Primary School}... | Ordinal |
| Experience | Experience of Respondent in Industry | {1, Years}... | Ordinal |
| Ethnicity | Ethnicity of Respondent | {1, Oromo}... | Nominal |
| Religion | Religion of Respondent | {1, Orthodox}... | Nominal |
| Marital | Marital Status of Respondent | {1, Single}... | Nominal |
| WDI1 | Workforce in our industry is characterized with multiplicity of perspectives | {1, Strongly Disagree}... | Scale |
| WDI2 | Workforce in our industry is characterized with multiplicity of knowledge | {1, Strongly Disagree}... | Scale |
| WDI3 | Workforce in our industry is diversified to bring improvement of product | {1, Strongly Disagree}... | Scale |
| WDI4 | Workforce in our industry is diversified to bring improvement of service quality | {1, Strongly Disagree}... | Scale |
| WDI5 | Workforce in our industry is diversified to enhance effective communication | {1, Strongly Disagree}... | Scale |
| WDI6 | Workforce in our industry is diversified to enhance information sharing in the firm | {1, Strongly Disagree}... | Scale |
| WDI7 | Workforce in our industry is diversified to support effective decision-making | {1, Strongly Disagree}... | Scale |
| WDI8 | Workforce in our industry is diversified to enhance problem solving in the firm | {1, Strongly Disagree}... | Scale |
| WDI9 | Workforce in our industry is diversified to enhance competitive advantage of firm | {1, Strongly Disagree}... | Scale |
| WDI10 | Workforce in our industry is diversified to enhance reputation of our firm | {1, Strongly Disagree}... | Scale |
| DMP1 | There is a clear flow of various ideas in our organization among the workers. | {1, Strongly Disagree}... | Scale |
| DMP2 | Our top management along with the human resource ensures the attraction of recruiting diverse workforce | {1, Strongly Disagree}... | Scale |
| DMP3 | Employees are not discriminated on the base of any dimension of diversity in our organization (age, gender, experience, educational background, ethnicity, religion) | {1, Strongly Disagree}... | Scale |
| DMP4 | Our organization conducts periodic diversity awareness sessions for employees | {1, Strongly Disagree}... | Scale |
| DMP5 | Our organization emphasizes diversity among team assignments | {1, Strongly Disagree}... | Scale |
| DMP6 | Our organization emphasizes inclusivity among team assignments | {1, Strongly Disagree}... | Scale |
| DMP7 | There is a Well management of team in which communication with trust growth up | {1, Strongly Disagree}... | Scale |
| DMP8 | Our organization practice Preventing discrimination | {1, Strongly Disagree}... | Scale |
| DMP9 | Our organization practice promotion inclusiveness | {1, Strongly Disagree}... | Scale |
| DMP10 | Our organization practice The act of empowering people | {1, Strongly Disagree}... | Scale |
| DMP11 | Our organization practice Understanding through using differences in every person | {1, Strongly Disagree}... | Scale |
| BAMD1 | Managing Diversity in our organization helps to enhance innovation with fresh ideas | {1, Strongly Disagree}... | Scale |
| BAMD2 | Managing Diversity in our organization makes teamwork a learning experience | {1, Strongly Disagree}... | Scale |
| BAMD3 | Managing Diversity in our organization improves the goodwill of an organization | {1, Strongly Disagree}... | Scale |
| BAMD4 | Managing Diversity in our organization improves morale of organization manpower | {1, Strongly Disagree}... | Scale |
| BAMD5 | Managing Diversity in our organization helps to have innovation activities throughout the whole member of the organization | {1, Strongly Disagree}... | Scale |
| BAMD6 | Managing Diversity in our organization helps in the process of achieving the planned goals | {1, Strongly Disagree}... | Scale |
| BAMD7 | Managing diversity in our organization facilitates an opportunity for the workers in being of productive | {1, Strongly Disagree}... | Scale |
| BAMD8 | Managing Diversity in our organization helps us to Increase problem solving through knowledge resources | {1, Strongly Disagree}... | Scale |
| BAMD9 | Managing diversity in our organization helps us to serve diverse customers (society) | {1, Strongly Disagree}... | Scale |
| PI1 | Developing new products with technical specifications that totally differing from the current ones | {1, Strongly Disagree}... | Scale |
| PI2 | Developing new products functionality that totally differing from the current ones | {1, Strongly Disagree}... | Scale |
| PI3 | Developing new products with components that totally differing from the current ones | {1, Strongly Disagree}... | Scale |
| PI4 | Developing new products materials that totally differing from the current ones | {1, Strongly Disagree}... | Scale |
| PI5 | Increasing output quality in manufacturing processes | {1, Strongly Disagree}... | Scale |
| PI6 | Increasing output quality in manufacturing techniques | {1, Strongly Disagree}... | Scale |
| PI7 | Increasing output quality in manufacturing machinery (software) | {1, Strongly Disagree}... | Scale |
| PI8 | Entails using new knowledge to offer a new product that customers desire | {1, Strongly Disagree}... | Scale |
| PI9 | Introduction of a new good one which consumers are not yet familiar with | {1, Strongly Disagree}... | Scale |
| PRI1 | Decreasing unit costs of production to produce significantly improved products | {1, Strongly Disagree}... | Scale |
| PRI2 | Decreasing unit costs of delivery to increase quality | {1, Strongly Disagree}... | Scale |
| PRI3 | Produce New goods that Significantly improved | {1, Strongly Disagree}... | Scale |
| PRI4 | Produce New services that significantly improved | {1, Strongly Disagree}... | Scale |
| PRI5 | Developing newness for current products leading to improved ease of use for customers | {1, Strongly Disagree}... | Scale |
| PRI6 | Developing newness on current products to improved customer satisfaction | {1, Strongly Disagree}... | Scale |
| PRI7 | New methods that significantly improved for the production | {1, Strongly Disagree}... | Scale |
| PRI8 | New methods that significantly improved for the Provision of services | {1, Strongly Disagree}... | Scale |
| MI1 | Significant changes to the aesthetic design of a good | {1, Strongly Disagree}... | Scale |
| MI2 | Significant changes to the packaging of a good | {1, Strongly Disagree}... | Scale |
| MI3 | New media for product promotion the first time use of a new advertising media | {1, Strongly Disagree}... | Scale |
| MI4 | New media for product promotion the first time use of a new brand image | {1, Strongly Disagree}... | Scale |
| MI5 | New media for product promotion the first time use of introduction of loyalty cards | {1, Strongly Disagree}... | Scale |
| MI6 | New methods for product placement (sales channels) first time use of franchising (distribution licenses) | {1, Strongly Disagree}... | Scale |
| MI7 | New methods for product placement (sales channels) first time use of direct selling | {1, Strongly Disagree}... | Scale |
| MI8 | New methods for product placement (sales channels) first time use of exclusive retailing | {1, Strongly Disagree}... | Scale |
| MI9 | New methods for product placement (sales channels) first time use of the concept for product presentation | {1, Strongly Disagree}... | Scale |
| MI10 | Modification of existing market structure through bringing up of new market strategies | {1, Strongly Disagree}... | Scale |
| MI11 | Modification of existing market structure through the changes of market behavior | {1, Strongly Disagree}... | Scale |
| MI12 | Modification of existing market structure through the rebuilding of market agents | {1, Strongly Disagree}... | Scale |
| MI13 | The execution of a new marketing method involving changes in pricing tactics | {1, Strongly Disagree}... | Scale |
| OI1 | New logistics, delivery (distribution methods) for your inputs, goods (services) | {1, Strongly Disagree}... | Scale |
| OI2 | Significantly improved logistics, delivery for your inputs, goods (services) | {1, Strongly Disagree}... | Scale |
| OI3 | New supporting activities for your processes such as (maintenance systems, operations for purchasing, accounting, computing) | {1, Strongly Disagree}... | Scale |
| OI4 | Significantly improved supporting activities for your processes such as (maintenance systems, operations for purchasing, accounting, computing) | {1, Strongly Disagree}... | Scale |
| OI5 | Renewing the processes employed to execute firm activities in innovative manner | {1, Strongly Disagree}... | Scale |
| OI6 | Renewing the routines employed to execute firm activities in innovative manner | {1, Strongly Disagree}... | Scale |
| OI7 | Renewing the procedures employed to execute firm activities in innovative manner | {1, Strongly Disagree}... | Scale |
| OI8 | The introduction of new organizational knowledge management systems for knowledge sharing | {1, Strongly Disagree}... | Scale |
| OI9 | The adoption of new techniques of information diffusion | {1, Strongly Disagree}... | Scale |
| PP1 | Ability to introduce new products to the market before competitors | {1, Strongly Disagree}... | Scale |
| PP2 | Ability to introduce new services to the market before competitors | {1, Strongly Disagree}... | Scale |
| PP3 | The increase of productivity at firm level | {1, Strongly Disagree}... | Scale |
| PP4 | The increase of real income of citizens | {1, Strongly Disagree}... | Scale |
| PP5 | Offer products that customers are willing to pay | {1, Strongly Disagree}... | Scale |
| PP6 | Offer services that customers are willing to pay | {1, Strongly Disagree}... | Scale |
| PP7 | The ability to produce the right goods of the right quality, at the right price, at the right time | {1, Strongly Disagree}... | Scale |
| PP8 | The ability to produce the right services of the right quality, at the right price, at the right time | {1, Strongly Disagree}... | Scale |
| MS1 | The ability to generate profit with having significant market share | {1, Strongly Disagree}... | Scale |
| MS2 | Export attractiveness through higher market access | {1, Strongly Disagree}... | Scale |
| MS3 | The ability to control of distribution | {1, Strongly Disagree}... | Scale |
| MS4 | Increased market share with reduced cost structure | {1, Strongly Disagree}... | Scale |
| MS5 | The ability of exporting its goods to global market | {1, Strongly Disagree}... | Scale |
| TD1 | Adoption of technology with increased improvement | {1, Strongly Disagree}... | Scale |
| TD2 | The firm able to detect (adapt) to changes in the environment | {1, Strongly Disagree}... | Scale |
| TD3 | Meeting competitive market criteria permanently more favorable than those rivals | {1, Strongly Disagree}... | Scale |
| TD4 | The availability of advanced highly educated people | {1, Strongly Disagree}... | Scale |
| TD5 | Improve employment skills through training | {1, Strongly Disagree}... | Scale |
| TD6 | The Availability of knowledge triangle (education, research and innovation) | {1, Strongly Disagree}... | Scale |
| FP1 | A good financial performance of a firm | {1, Strongly Disagree}... | Scale |
| FP2 | The ability of a firm to sell products | {1, Strongly Disagree}... | Scale |
| FP3 | Both products and prices are related to fit the requirements of the relevant markets | {1, Strongly Disagree}... | Scale |
| FP4 | Both products and prices are related to be remain profitable | {1, Strongly Disagree}... | Scale |
| FP5 | Return on sales, return on assets, turn over | {1, Strongly Disagree}... | Scale |
| BS1 | The ability of the company to continue the business (protect its investments) | {1, Strongly Disagree}... | Scale |
| BS2 | The ability of firm to generating return on investments | {1, Strongly Disagree}... | Scale |
| BS3 | The ability of the firm in guaranteeing future employment | {1, Strongly Disagree}... | Scale |
| BS4 | Value creation with increased customer satisfaction | {1, Strongly Disagree}... | Scale |
| BS5 | Firm strategy utilization leading to achievement of firm objectives (goals) | {1, Strongly Disagree}... | Scale |
| BS6 | The ability to design products superior to those offered by competitors | {1, Strongly Disagree}... | Scale |
| BS7 | The ability to produce products superior to those offered by competitors | {1, Strongly Disagree}... | Scale |
| BS8 | The ability to market products superior to those offered by competitors | {1, Strongly Disagree}... | Scale |
| relation | in a Relationship or not in a Relationshp | {1, in a Relationship}... | Nominal |
| TWDI | Total Workforce Diversity Indicator | {1, Strongly Disagree}... | Scale |
| TDMP | Total Diversity Management Practices | {1, Strongly Disagree}... | Scale |
| TBAMD | Total Business Advantage of Managing Diversity | {1, Strongly Disagree}... | Scale |
| TDM | DIVERSITY MANAGEMENT | {1, Strongly Disagree}... | Scale |
| TPI | Total Product Innovation | {1, Strongly Disagree}... | Scale |
| TPRI | Total Process Innovation | {1, Strongly Disagree}... | Scale |
| TMI | Total Marketing Innovation | {1, Strongly Disagree}... | Scale |
| TOI | Total Organizational Innovation | {1, Strongly Disagree}... | Scale |
| TII | INTEGRATED INNOVATION | {1, Strongly Disagree}... | Scale |
| TPP | Total Production and Productivity | {1, Strongly Disagree}... | Scale |
| TMS | Total Market Share | {1, Strongly Disagree}... | Scale |
| TTD | Total Technology and Development | {1, Strongly Disagree}... | Scale |
| TFP | Total Financial Performance | {1, Strongly Disagree}... | Scale |
| TBS | Total Business Sustainability | {1, Strongly Disagree}... | Scale |
| TFC | FIRM COMPETITIVENESS | {1, Strongly Disagree}... | Scale |
| Age1 | Our industry is comprised of many youthful employees | {1, Strongly Disagree}... | Scale |
| Age2 | The inclusion of all age group promotes the firm effectiveness | {1, Strongly Disagree}... | Scale |
| Age3 | Diverse age categories among employees has improved learning experience in our industry | {1, Strongly Disagree}... | Scale |
| Gend1 | Mixed gender teams achieve higher results in terms of increase in profits | {1, Strongly Disagree}... | Scale |
| Gend2 | Our industry is balanced in both gender | {1, Strongly Disagree}... | Scale |
| Gend3 | Diversity in gender leads to good effectiveness | {1, Strongly Disagree}... | Scale |
| Edu1 | The recruitment plan of the our industry is based on the educational background of applicants | {1, Strongly Disagree}... | Scale |
| Edu2 | The industry encourages employees to upgrade their educational qualification | {1, Strongly Disagree}... | Scale |
| Edu3 | Different educational background brings diverse experience leading to good performance | {1, Strongly Disagree}... | Scale |
| Ethn1 | Diverse ethnic orientation promotes a sense of unity among employees | {1, Strongly Disagree}... | Scale |
| Ethn2 | Our industry Attracts and hires employees from all ethnic background | {1, Strongly Disagree}... | Scale |
| Ethn3 | Different languages used to communicate create problems among employee | {1, Strongly Disagree}... | Scale |
| Relig1 | Religious practices do not affect an organization’s productivity negatively | {1, Strongly Disagree}... | Scale |
| Relig2 | Respecting differences in religion help creating a welcoming and inclusive workplace | {1, Strongly Disagree}... | Scale |
| Relig3 | The organization provide prayer or meditation spaces in the workplace | {1, Strongly Disagree}... | Scale |
| Exp1 | Appreciating different skills and experiences means a workplace that supports advancement in careers | {1, Strongly Disagree}... | Scale |
| Exp2 | Being open to different experiences and skills means helping employees learn from each other | {1, Strongly Disagree}... | Scale |
| Exp3 | Embracing multiple skills and experiences help the industry gain new knowledge and skills | {1, Strongly Disagree}... | Scale |
| Mari1 | Our industry considers the marital status of the employees when recruiting | {1, Strongly Disagree}... | Scale |
| Mari2 | Appreciating marriages in our industry enhanced employee work commitment | {1, Strongly Disagree}... | Scale |
| Mari3 | Different kinds of support are facilitated for marriage by our industry help to increase moral of youth | {1, Strongly Disagree}... | Scale |
| TAge | Total Age Diversity | {1, Strongly Disagree}... | Scale |
| TGender | Total Gender Diversity | {1, Strongly Disagree}... | Scale |
| TEducation | Total Education Diversity | {1, Strongly Disagree}... | Scale |
| TEthnicity | Total Ethnicity Diversity | {1, Strongly Disagree}... | Scale |
| TReligion | Total Religion Diversity | {1, Strongly Disagree}... | Scale |
| TExperience | Total Experience Diversity | {1, Strongly Disagree}... | Scale |
| TMarital | Total Marital Status Diversity | {1, Strongly Disagree}... | Scale |
